# Supplementary material for: Of Older Mice and Men: Branched-Chain Amino Acids and Body Composition
Source: MDPI journal article supplement (doi:10.3390/nu11081882), 2019-08-13
Supplement: s1 [file s1]

**Figure S1** – Circulating BCAAs and age, PASE, number of morbidities, smoking status and source of income

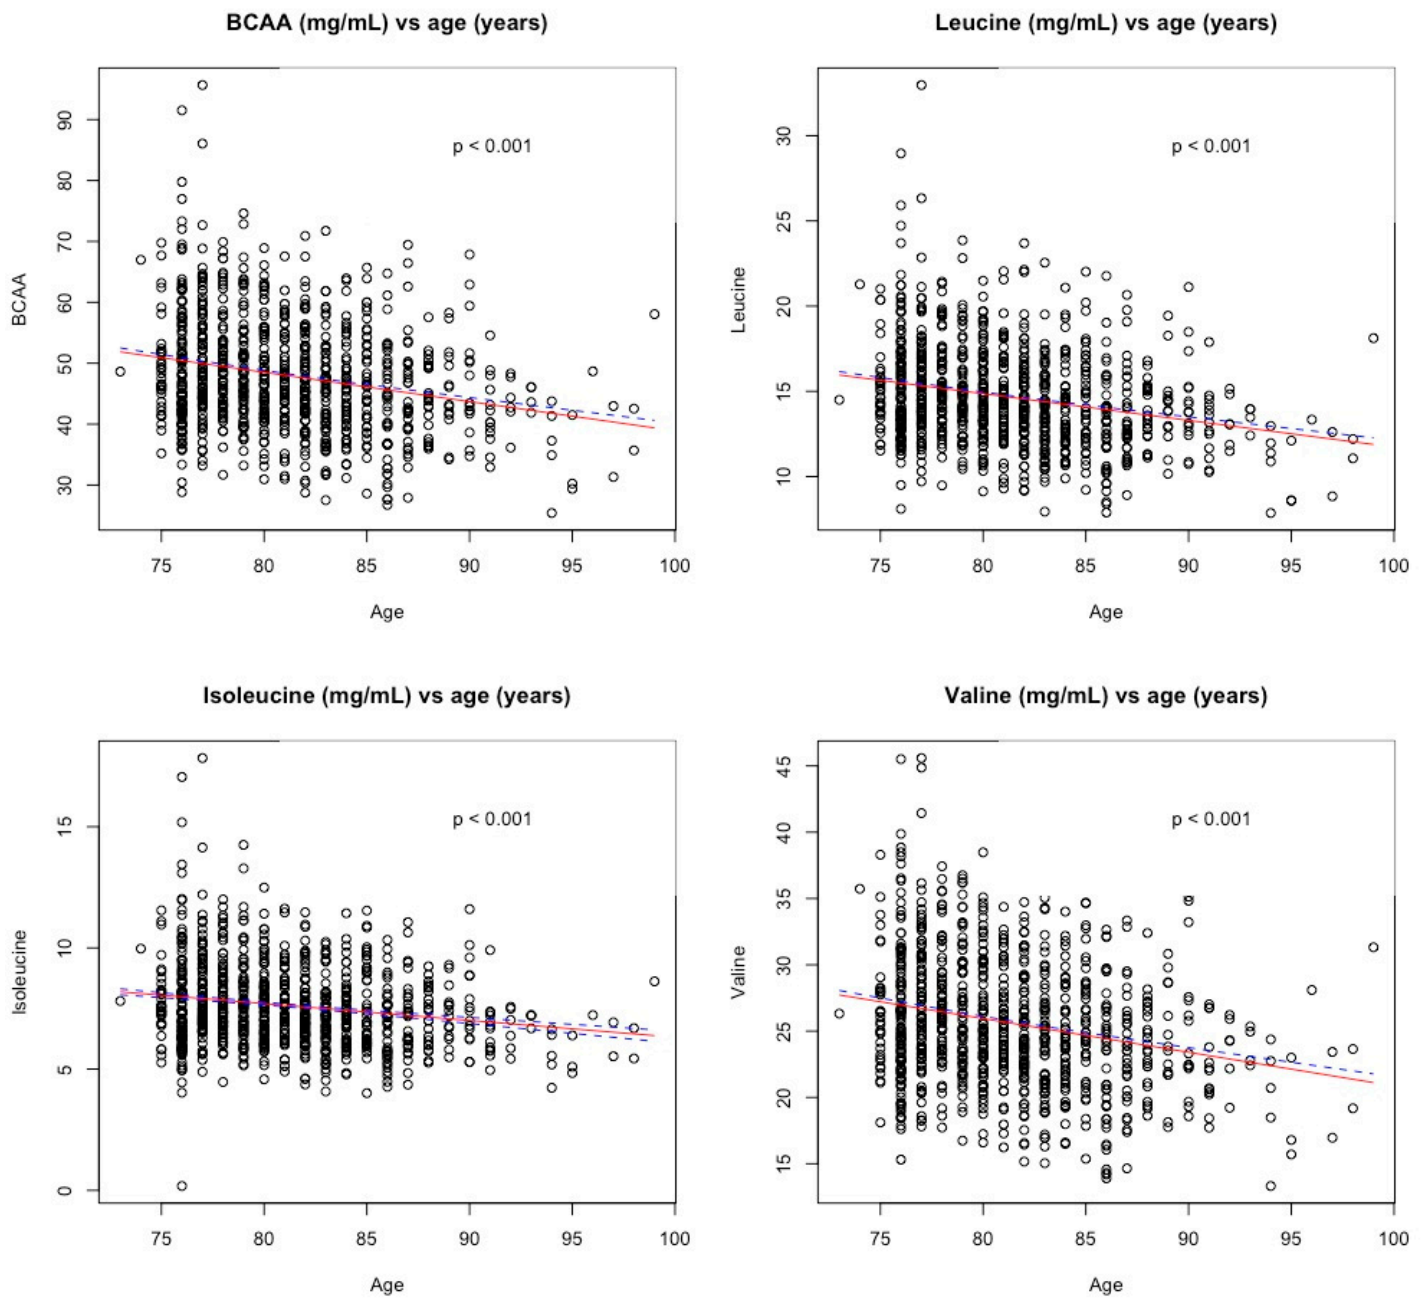

**BCAA (mg/mL) vs PASE (points)**

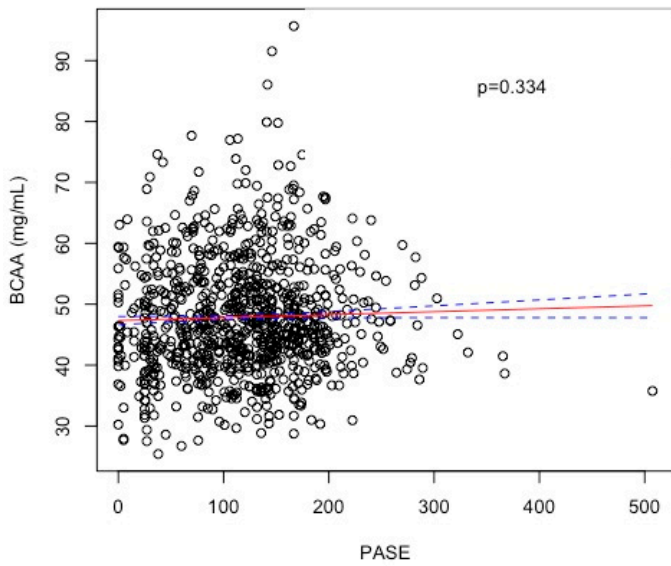

**BCAA (mg/mL) vs no of morbidities**

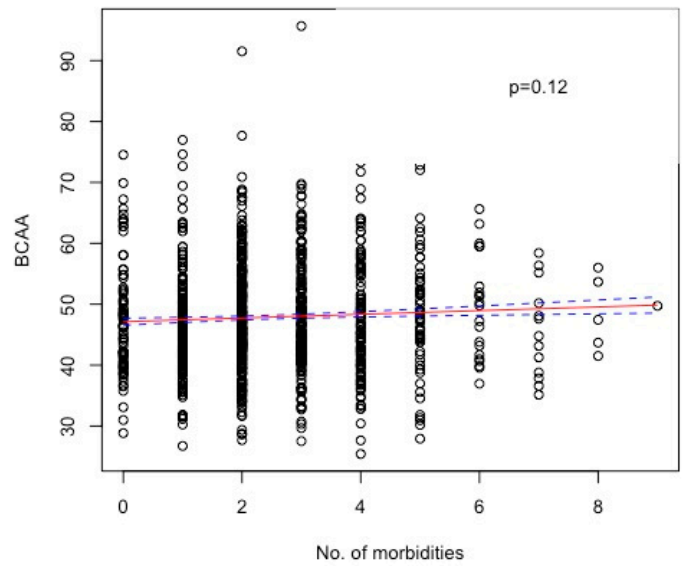

**BCAA by smoking status**

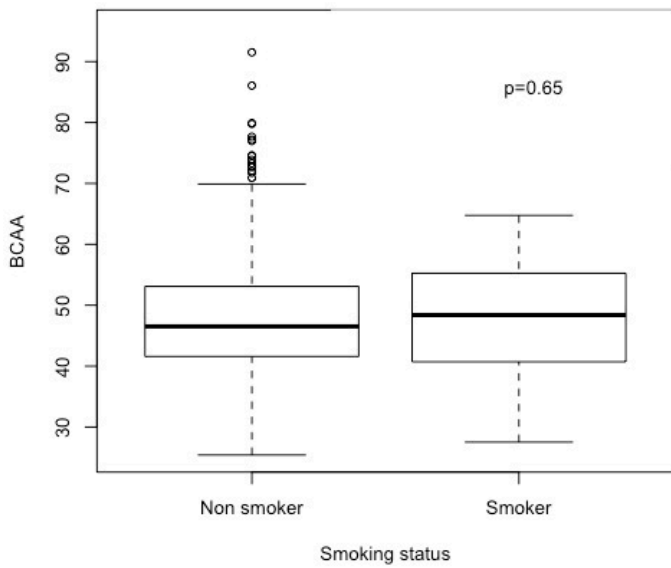

**BCAA by source of income**

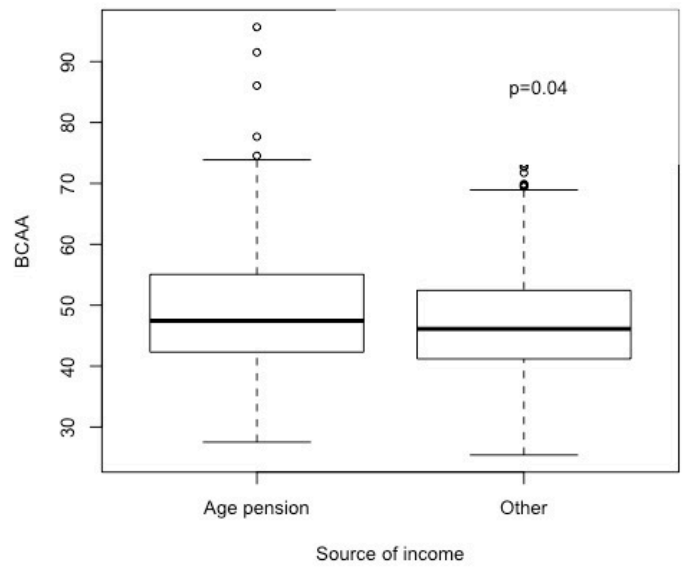

BCAA, branched-chain amino acid; PASE, Physical Activity Scale for the Elderly

Circulating branched-chain amino acids and their association with age, physical activity level (as measured by Physical Activity Scale for the Elderly), number of morbidities, income and smoking status in the human cohort.
